1 **TITLE PAGE**

2 **Loss of the RNA helicase *Dhx15* impairs endothelial energy metabolism,**  
3 **lymphatic drainage and tumor metastasis in mice**

4 Jordi Ribera<sup>1</sup>, Irene Portolés<sup>1</sup>, Bernat Córdoba<sup>1</sup>, Juan Rodríguez-Vita<sup>1,2</sup>, Gregori  
5 Casals<sup>1</sup>, Bernardino González de la Presa<sup>1</sup>, Mariona Graupera<sup>3</sup>, Guadalupe  
6 Soria<sup>4</sup>, Raúl Tudela<sup>4</sup>, Anna Esteve-Codina<sup>5</sup>, Guadalupe Espadas<sup>6</sup>, Eduard  
7 Sabidó<sup>6</sup>, Wladimiro Jiménez<sup>1,7</sup>, William C. Sessa<sup>8</sup>, Manuel Morales-Ruiz<sup>1,7,\*</sup>

8 <sup>1</sup>Biochemistry and Molecular Genetics Department, Hospital Clínic of  
9 Barcelona, Institut d'Investigacions Biomèdiques August Pi i Sunyer (IDIBAPS),  
10 Centro de Investigación Biomédica en Red de Enfermedades Hepáticas y  
11 Digestivas (CIBERehd), Barcelona, Spain.

12 <sup>2</sup>German Cancer Research Center, Heidelberg, Germany.

13 <sup>3</sup>Vascular Signalling Laboratory, Program Against Cancer Therapeutic  
14 Resistance (ProCURE), Institut d'Investigació Biomèdica de Bellvitge (IDIBELL).  
15 CIBERonc, Barcelona, Spain.

16 <sup>4</sup>Experimental 7T-MRI Unit, IDIBAPS, Barcelona, Spain, CIBERbbn, University  
17 of Barcelona, Barcelona, Spain tudela.mri@gmail.com, gsoriar@clinic.cat.

18 <sup>5</sup>CNAG-CRG, Centre for Genomic Regulation (CRG), Barcelona Institute of  
19 Science and Technology (BIST), Universitat Pompeu Fabra (UPF), Barcelona,  
20 Spain. (anna.esteve@cnag.crg.eu)

21 <sup>6</sup>Proteomics Unit, Centre for Genomic Regulation (CRG), The Barcelona  
22 Institute for Science and Technology, Universitat Pompeu Fabra, Barcelona,  
23 Spain.

24 <sup>7</sup>Department of Biomedicine-Biochemistry Unit, School of Medicine University of  
25 Barcelona, Barcelona, Spain.

26 <sup>8</sup>Department of Pharmacology, Department of Cardiology, Vascular Biology and  
27 Therapeutics Program, Yale University School of Medicine, New Haven,  
28 Connecticut, USA.

29 \* **Corresponding author:** Dr. Manuel Morales-Ruiz, Department of  
30 Biochemistry and Molecular Genetics, Hospital Clinic of Barcelona, 170  
31 Villarroel Street, 08036 Barcelona, Spain; e-mail: [morales@clinic.ub.es](mailto:morales@clinic.ub.es)

32

33 **ABSTRACT**

34 DHX15 is an ATP-dependent RNA helicase involved in pre-mRNA splicing and  
35 a downstream substrate for Akt1, which plays a significant role in vascular  
36 biology. The aim of this study was to explore the regulatory function of DHX15  
37 over the vasculature and endothelial cell biology. **Results:** DHX15<sup>-/-</sup> was lethal  
38 in mouse and zebrafish embryos. DHX15<sup>-/-</sup> zebrafish also showed an  
39 undeveloped parachordal line, which leads to the formation of lymphatic  
40 structures. DHX15<sup>+/-</sup> mice triggered lower vascular network density and  
41 impaired lymphatic function postnatally. Transcriptome and proteome analysis  
42 of DHX15 silenced LEC revealed alterations in the glycolysis and  
43 gluconeogenesis pathways. The validation of these results demonstrated an  
44 uncoupling of the glycolysis with the oxidation of pyruvate in the mitochondria  
45 and a lower activity of the Complex I, resulting in lower cellular ATP production.  
46 Noteworthy, DHX15<sup>+/-</sup> mice partially inhibited primary tumor growth and reduced  
47 lung metastasis after injection of LLC1 tumor cells.

48

49 **Keywords:** DHX15, endothelial cell, metabolism, vascular biology, vascular  
50 function.

51

52

53

54

55

56

57

## 58 INTRODUCTION

59 RNA helicases are highly conserved and widespread enzymes that play a  
60 fundamental role in RNA metabolism through the control of basic RNA  
61 processes such as ribosome formation, pre-mRNA maturation, nuclear  
62 transportation, RNA translation, transcription initiation, degradation and folding  
63 of RNA (Patel and Donmez, 2006). They also play an essential role in the  
64 detection of viral RNAs (Jankowsky et al., 2011). RNA helicases are classified  
65 into two different subfamilies: the DEAD-box family (DDX), and the DEAH-box  
66 (DHX) family (Jankowsky et al., 2011; Umate et al., 2011). Specifically, the DHX  
67 family consists of 16 members, which have been identified based on their  
68 homology within the amino acid sequences of the helicase domain (Suthar et  
69 al., 2016; Umate et al., 2011).

70 RNA helicases act by remodelling RNA structures through ATP hydrolysis,  
71 which exerts a mechanical force resulting in the alteration of the RNA  
72 configuration that is fundamental for many cellular processes. This RNA  
73 reconfiguration is due to the translocation of the helicase along the RNA which  
74 unwinds RNA duplexes and dissociates bound proteins (Bourgeois et al., 2016;  
75 Chen et al., 2001; Jankowsky et al., 2001). It has been recently discovered that  
76 since DHX helicases lack target selectivity they require the action of adapter  
77 proteins, such as G-patch proteins, to aid in the recruitment of RNA targets to  
78 the functional site of the helicase. These kind of DHX activators stabilize a  
79 functional conformation with high RNA affinity enhancing the catalytic activity of  
80 the helicase (Studer et al., 2020).

81 In recent years, RNA helicases have gained notoriety due to their role in cell  
82 maintenance, controlling many biological processes, including cell differentiation

83 and apoptosis (Jiang and Wu, 1999). Also, several groups have linked the  
84 defects in helicase functioning with cancer, infectious diseases, and  
85 neurodegenerative disorders (Jankowsky et al., 2011). For instance, recent  
86 studies have shown that the deregulated expression of an increasing number of  
87 these enzymes usually appears in many types of tumors (Abdelhaleem, 2004;  
88 Robert and Pelletier, 2013), hence being related to carcinogenesis and cancer  
89 progression (Abdelhaleem et al., 2003; Fuller-Pace, 2013, 2006; Heerma van  
90 Voss et al., 2017; Steimer and Klostermeier, 2012). Despite these initial studies,  
91 the understanding of the pathological mechanisms driven by the RNA helicases  
92 and their individual specificity or redundancy over their molecular targets is still  
93 limited.

94 DHX15 is a newly identified member of the DEAH-box RNA helicase family,  
95 located in the cell nucleus that regulates pre-mRNA maturation (Fouraux et al.,  
96 2002; Niu et al., 2012). DHX15 is known to contribute to ribosome biogenesis  
97 by participating in some steps of the small subunit maturation, and in splicing by  
98 dissociating the spliceosome modules after completion of its function (Arenas  
99 and Abelson, 1997; Combs et al., 2006; Martin et al., 2002; Tsai et al., 2005).  
100 DHX15 has ubiquitous variable expression in healthy tissues and organs  
101 (Imamura et al., 1997). This helicase is also present in retinal endothelial cells  
102 that line the arborizing microvasculature in the human retina (Bharadwaj et al.,  
103 2013). In pathological situations, some studies have shown that DHX15  
104 expression can be dysregulated due to exacerbated autoimmune response  
105 (Mosallanejad et al., 2014; Wang et al., 2016) and different types of cancer  
106 (Albrecht et al., 2004; Lin et al., 2009; Nakagawa et al., 2006; Pan et al., 2017).

107 The serine/threonine kinase Akt1 plays an essential role in vascular biology as  
108 a central signaling node that coordinates major cellular processes (Chen et al.,  
109 2008; Lee et al., 2014; Pauta et al., 2016). Its primary signaling function relays  
110 on the fact that Akt1-dependent phosphorylation leads to the regulation of  
111 critical mediators that control different cellular processes, including cell death,  
112 cell growth, and chemotaxis. In a previous study, we demonstrated that only the  
113 Akt1 isoform can phosphorylate DHX15 in mouse lung endothelial cells (Lee et  
114 al., 2014). This observation led us to hypothesize that DHX15 contributes to  
115 some extent to the vascular functions of Akt. Therefore, the goal of the present  
116 study was to characterize the vascular phenotypes and the pathological  
117 mechanism associated with the DHX15 gene deficiency generated by gene  
118 editing of this enzyme in mice and zebrafish.

119

120

121

122

123

124

125

126

127

128

129

130

131 **RESULTS**

132 **Homozygous loss of DHX15 gene is associated with embryonic lethality in**

133 **mice.** The physiological and pathophysiological effect of perturbations in the  
134 DHX15 gene has not previously been assessed due to the lack of genetically  
135 modified experimental models for this gene. Therefore, we generated a global  
136 knockout mouse for DHX15 as described under the Materials and Methods  
137 section. Exon 2 of the *DHX15* gene was selected as TALEN target site for  
138 knockout mouse production, resulting in two different DHX15-deficient mouse  
139 clones: Mouse-ID#35, and Mouse-ID#39. Both clones were used  
140 interchangeably in the subsequent experiments without detecting significant  
141 differences in the phenotypes or the results obtained (Fig. 1A).

142 Heterozygous DHX15 (DHX15<sup>+/-</sup>) mice were viable without any apparent  
143 phenotypic abnormalities but intercrosses between DHX15<sup>+/-</sup> showed no viable  
144 homozygous mice (DHX15<sup>-/-</sup>). To establish the embryonic lethality period, timed  
145 pregnancies of DHX15<sup>+/-</sup> breeding were examined at embryonic day (E) 8.5. No  
146 DHX15<sup>-/-</sup> embryos were obtained at this time point suggesting post-implantation  
147 embryonic lethality before E8.5 (Fig. 1B).

148 **DHX15 gene deficiency causes blood and lymphatic vascular defects**

149 **during embryonic stages.** Previous studies demonstrated the role of Akt in  
150 vascular development (Chen et al., 2008; Lee et al., 2014). To investigate  
151 whether DHX15, as a downstream target of Akt, contributes to these vascular  
152 defects we performed whole-mount blood vessel staining followed by 3D  
153 visualization in E10.5 mouse embryos to quantify potential vascular  
154 abnormalities. DHX15<sup>+/-</sup> embryos do not exhibit significant defects in  
155 segmentation. However, heterozygous embryos showed lower vascular density

156 compared with wild-type (Fig. 1C). This deficiency is mainly evident in the heart  
157 region and the intersomitic arteries that sprout out or are located between the  
158 somites.

159 Early embryonic lethality caused in mice by DHX15 deficiency limits the  
160 characterization of embryonic vascular anomalies motivated by this genetic  
161 disturbance in homozygosis. In order to overcome this limitation, we generated  
162 a DHX15 gene deficient zebrafish mutant by Crispr/Cas9 editing in a  
163 Tg(*flk1*:EGFP) background, as described in the material and methods section.

164 Wild-type zebrafish embryos showed DHX15 mRNA expressed broadly across  
165 the larvae on 5 day post fertilization (dpf) (Fig. 1D, panels a, d and g) with an  
166 enriched expression in the vascular system, specifically in the dorsal aorta and  
167 the intersegmental vessels (Fig. 1D panels c, f and i), as post-natal  
168 development progresses (24, 48 and 72 hours). DHX15<sup>-/-</sup> zebrafish embryos at  
169 the stage 5 dpf were also screened for the expression of GFP in the  
170 vasculature. DHX15 deficiency caused vascular development impairment in  
171 primary arteries and veins, compared with the wild-type embryos. This  
172 impairment was characterized by generalized dilatation of the vasculature,  
173 especially in the cardinal vein and the intersegmental vessels (ISV) (Fig 2A).

174 These defects were extended to developing lymphatic structures, such as the  
175 parachordal line (Jung et al., 2017). In control embryos, the parachordal line  
176 was detected in nearly every somite segment (Figure 3A, arrows). By contrast,  
177 the number of parachordal lines was 63% lower in the DHX15<sup>-/-</sup> embryos.

178 Similar to mice, completed DHX15 deficiency was lethal in zebrafish. To  
179 establish the embryonic lethality period, we monitored the larvae mortality  
180 during the first 10 dpf (Fig. 2B). The DHX15<sup>-/-</sup> larvae started to die at 6 dpf and



181 reached a 100% mortality at the stage 8 dpf. These animals developed  
182 morphological defects including encephalic and cardiac edema, scoliosis, and  
183 impaired neural/eye growth; compared to wild-type embryos (Fig. 2C) and the  
184 onset of these morphological defects was at 3 dpf. In contrast, DHX15<sup>+/+</sup> and  
185 DHX15<sup>+/-</sup> did not show significant differences in survival throughout embryonic  
186 development or postnatally.

187 **Vascular density and lymphatic functionality are impaired postnatally in**  
188 **DHX15<sup>+/-</sup> mice.** Due to the mortality associated with the lack of DHX15 in  
189 homozygotes, it was only possible to characterize the vascular role of DHX15 in  
190 viable adult heterozygotic mice (DHX15<sup>+/-</sup>). DHX15<sup>+/-</sup> mice showed significant  
191 vascular malformations compared with wild-type mice. Whole-mount preparations  
192 of trachea tissue for the quantification of vessel pruning demonstrated that  
193 DHX15<sup>+/-</sup> mice exhibited reduced vascular densities and an impaired  
194 connectivity between large vessels (arrows), compared with littermate WT mice  
195 (Fig. 3A).

196 We also evaluated lymphatic function in adult DHX15<sup>+/-</sup> mice by two different  
197 methodologies. First, fluorescent lymphangiographies were performed in  
198 peripheral regions using FITC-dextran. The lymphatic vasculature of DHX15<sup>+/-</sup>  
199 mice depicted diminished fluid drainage, compared with WT mice in three different  
200 peripheral tissues: the ear, the tail and the foodpad (Fig. 3B). Second, we  
201 quantified lymphatic drainage of the contrast agent gadolinium in the hindlimbs  
202 after femoral artery ligation. This model is associated with increased vascular  
203 permeability and the consequent accumulation of fluid in interstitial spaces. For  
204 this purpose, we performed MRI in WT and DHX15<sup>+/-</sup> mice, 4 weeks after the  
205 femoral artery ligation. In the ischemic legs (red circles Fig. 3C), all the DHX15<sup>+/-</sup>

206 mice showed impaired lymphatic drainage with the consequent significant  
207 increase in gadolinium accumulation, as observed by the increase area under the  
208 concentration curve calculated in DHX15<sup>+/-</sup> mice, compared to control animals  
209 (57.72±3.19 vs. 44.45±2.35 nM·s, respectively;  $p<0.05$ ).

210 **Mechanistic insights of DHX15 deficiency in mouse endothelial cells. Role**

211 **of DHX15 in carbohydrate metabolism.** The *in vivo* experiments documented

212 that reduced levels of DHX15 caused cardiovascular and lymphatic  
213 abnormalities. To obtain information on the mechanisms responsible for these

214 phenotypes in both vascular systems, we performed RNAseq and proteomics in

215 endothelial cells with or without DHX15 gene silencing using a LEC cell line

216 engineered to express the Tet-On® induction system for silencing DHX15 (siL-

217 DHX15-LEC, see material and methods). The advantage of using this cell line is

218 that these cells maintain both cardiovascular and lymphatic endothelial cell

219 characteristics, enabling the potential extrapolation of the mechanistic findings

220 into both vascular systems (supplemental figure 1). For instance, LEC displayed

221 endothelial cell markers (CD31, eNOS and uptake of oxidized low-density

222 lipoprotein; supplemental figure 1A and C) but also classical lymphatic cell

223 markers (LYVE-1 and podoplanin; supplemental figure 1B and C, respectively).

224 Supplemental figure 1D documents the total DHX15 levels in the starting cells

225 with or without DHX15 silencing that were used for genomic and proteo-

226 genomics experiments. The RNA-seq experiment allowed us generating

227 122,968 paired-end reads that were successfully mapped to the mouse

228 reference GRCm38 genome assembly. After quality control analysis, four

229 samples per experimental condition were included in the analysis. A total of

230 5,408 isoforms were differentially expressed when considering a

231 stringent threshold of FDR <0.001 (Supplementary Table S1). For the  
232 proteomics experiment, protein extracts (n=5 for each experimental condition)  
233 were digested into peptides and they were quantified by mass spectrometry  
234 analysis, as described in material and methods. We prioritized those protein  
235 variations that showed a p-value lower than 0.05 or when the protein was  
236 present in one condition, and undetectable in all the cases of the other  
237 experimental condition. The list of proteins with relevant changes in their  
238 abundance due to the silencing of DHX15 are detailed in Supplementary Table  
239 S2.

240 In an effort to understand the biological relevance of the -omics results, we  
241 combined the results of the RNAseq and proteomic experiments and subjected  
242 the final list to pathway analysis using the Ingenuity Pathway Analysis (IPA;  
243 Ingenuity) database. The results were compared against global molecular  
244 networks to identify associated diseases and canonical pathways affected by  
245 the perturbation of DHX15. The DHX15 silencing significantly affects two  
246 networks: 1) endocrine system disorders, organismal injury and abnormalities  
247 and cancer, and 2) gastrointestinal disease, organismal injury and abnormalities  
248 and carbohydrate metabolism (Supplemental figure 2, A and B). Also, the  
249 reduction of DHX15, was associated with differential expression in nine  
250 additional signalling pathways (Supplemental figure 3A). Among them, the  
251 glycolysis and gluconeogenesis pathways.

252 To functionally validate these bioinformatic results, we measured the glycolytic  
253 activity and ATP generation in LEC cells. In accordance to our findings, siL-  
254 DHX15-LEC cells showed higher levels of glycolytic activity (measured as nM of  
255 L-Lactate) compared to cells with the DHX15 wild-type gene ( $0.41\pm 0.04$  vs.

256 0.19±0.05 nM L-lactate, respectively;  $p<0.05$ ) (Fig. 4A). The alterations in  
257 glucose metabolism was linked to lower ATP production compared to WT LEC  
258 cells (417.7±31.37 vs. 524.2±20.40 nM ATP, respectively;  $p<0.05$ ) (Fig. 4B),  
259 suggesting uncoupling between glycolysis and oxidative phosphorylation. In this  
260 context, the rMATS analysis of alternative 5' splice site from the RNAseq data  
261 identified 220 significant splicing event modifications (with FDR<5%, absolute  
262 difference >5% and >70 number of reads) caused by DHX15 silencing  
263 (Supplementary Table S3). Among these genes, NADH ubiquinone  
264 oxidoreductase core subunit S1 (NDUFS1) showed a differential alternative  
265 splicing characterized by the presence of an alternative 5' splice site, giving rise  
266 to a longer exon 1 for NDUFS1, when DHX15 was silenced in LECs (Fig.4C).  
267 This gene encodes a subunit of the mitochondrial respiratory chain complex I. In  
268 agreement with this observation, the in-gel activity measurement of complex I  
269 was reduced significantly by ~50% in the siL-DHX15-LEC condition, compared  
270 with non-silenced LEC cells (0.50±0.04 vs. 1.00±0.03 relative units,  
271 respectively;  $p<0.01$ ) (Fig. 4D).

272 Next, to assess the impact of reduced energy biosynthesis in siL-DHX15-LEC,  
273 we quantified cell proliferation and migration. Silencing of *DHX15* reduced BrdU  
274 uptake compared to control LEC (55.53±0.49 vs. 66.43±0.46 % of cells BrdU  
275 positives, respectively;  $p<0.01$ ) (Fig. 5A). Accordingly, the reduction of DHX15  
276 resulted in an impaired cell migration. Silenced DHX15-LECs presented  
277 delayed wound-healing after 24 hours compared with control LEC, as measured  
278 in a scratch-induced directional wound-healing assay (Fig. 5B).

279 **Heterozygous *DHX15* gene deficiency reduced tumor growth and**  
280 **metastases.** Abnormal function of blood and lymphatic vessels plays a

281 pathological role in multiple pathological conditions including inflammation and  
282 cancer. Also, there is a strong link between the lymphatic vasculature and tumor  
283 spread, as lymphatic vessels constitute one of the main routes of metastasis in  
284 most cancers (Achen and Stacker, 2008; Mumprecht and Detmar, 2009;  
285 Sleeman and Thiele, 2009). Considering also that one of the pathways modified  
286 by the reduction of DHX15 was “endocrine system disorders, organismal injury  
287 and abnormalities and cancer”, we aimed at evaluating the role of DHX15 in  
288 tumor development.

289 First, we explored how the loss of DHX15 affected growth of tumors implanted  
290 into WT and DHX15<sup>+/-</sup> mice by injecting syngeneic LLC1 cells (1x10<sup>5</sup>) into the  
291 flanks of both strains. We measured the volume of the primary tumors  
292 implanted in these mice 21 days post-injection of the LLC1 cells. Primary  
293 tumors were significantly smaller in DHX15<sup>+/-</sup> mice compared with controls  
294 (0.54±0.07 vs. 1.06±0.17 cm<sup>3</sup>, respectively; *p*<0.01) (Fig. 6, panels a and d).  
295 Tumors from DHX15<sup>+/-</sup> mice also showed an impaired vascular network  
296 characterized by smaller vascular perimeter, compared with WT littermates  
297 (199.1±9.81 vs. 312.5±17.16 µm perimeter, respectively; *p*<0.01) (Fig. 6, panels  
298 b and e). Since growth of the primary tumor is rate-limiting and precludes  
299 analyses of metastasis in this model, we established a postsurgical metastasis  
300 model. Three weeks after subcutaneous LLC1 cells implantation, primary  
301 tumors were completely resected and postsurgical lung metastasis were  
302 evaluated 2 weeks later. Fewer primary tumors from DHX15<sup>+/-</sup> mice  
303 metastasized the lungs compared with wild-type mice (*p*<0.01) (Supplemental  
304 figure 3B). Noteworthy, and considering the mice with lung metastasis, the  
305 overall area of metastases was strongly decreased in DHX15<sup>+/-</sup> mice, compared

306 with the wild-type group ( $0.88\pm 0.32$  vs.  $2.53\pm 0.69$  % lung metastases,  
307 respectively;  $p<0.05$ ) (Fig. 6, panels c and f).

308 To investigate further whether the differences in the size of lung metastasis  
309 were due to a potential lower LLC1 cell seeding in the primary tumors, we  
310 followed over time a group of mice with similar primary large-size tumors. In this  
311 experimental group (size of primary tumors ranging from 0.81 to 1.13 cm<sup>3</sup>), we  
312 also found significant differences when we compared the areas of lung  
313 metastasis between wild-type and DHX15<sup>+/-</sup> mice, being significantly lower in  
314 the DHX15<sup>+/-</sup> mice ( $6.27\pm 1.12$  vs.  $0.20\pm 0.20$  vs. % lung metastases,  
315 respectively;  $p<0.01$ ) (Fig. 6, lower right graph).

316

317

318

319

320

321

322

323

324

325

326

327

328

329

330

## 331 **DISCUSSION**

332 In previous studies, we identified DHX15 as a downstream target of Akt1, which  
333 has the greatest influence on vascular regulation compared with the other Akt  
334 isoforms (Chen et al., 2008; Lee et al., 2014; Pauta et al., 2016). Considering  
335 this observation, we hypothesized as a starting point for this study that DHX15  
336 may also play a role in the vascular function. Here, we show that homozygous  
337 DHX15 deficiency was associated with embryonic mortality in mice. To  
338 determine when lethality occurred, timed pregnancies of DHX15<sup>+/-</sup> breeding  
339 were studied at E8.5. We did not detect any DHX15<sup>-/-</sup> embryos at this time point,  
340 suggesting early lethality post-implantation. On the other hand, the loss of just  
341 one DHX15 allele resulted in impaired lymphatic drainage and decreased  
342 vascular blood density. These results are in agreement with the reduced cell  
343 proliferation and migration that we observed in LEC after silencing the  
344 expression of DHX15. Why vasculature is affected by the partial loss of DHX15  
345 in adult mice remains unclear if we only consider the results of this experimental  
346 model. Under this experimental setting, we cannot discard the possibility that  
347 adult mice developed these vascular defects because of accumulated damage  
348 occurring during the postnatal stage in the DHX15 deficiency background.  
349 However, and by studying the role of this RNA helicase in DHX15 gene-  
350 deficient zebrafish, we showed that the DHX15-related vascular defects are  
351 also occurring during development. In this experimental model, we found that  
352 DHX15<sup>-/-</sup> larvae were not viable. Also, these unviable larvae presented blood  
353 vascular alterations and reduced formation of developing lymphatic structures,  
354 which were associated with cardiac and encephalic edema in the embryos.

355 Some unaddressed questions are whether each member of the RNA helicases  
356 family has unique physiological functions and whether they are used  
357 redundantly by the cell. The lethal phenotype of the DHX15<sup>-/-</sup> mouse and  
358 zebrafish embryo supports the concept that RNA helicases may present unique  
359 functions and specificity for molecular targets, likely in combination with adapter  
360 proteins as demonstrated by Studer et al. (Studer et al., 2020).

361 Vascular growth and lymphangiogenesis are crucial in tumor growth and  
362 metastasis (He et al., 2015; Nishida et al., 2006). Therefore, we assessed the  
363 role played by DHX15 deficiency in tumor formation and expansion. After  
364 performing syngeneic LLC1 cells allotransplantation in mice, we found that  
365 heterozygous DHX15 deficiency partially inhibits primary tumor growth and  
366 reduced lung metastases. This effect was associated with an intratumoral  
367 reduction in the length of the blood vessel capillaries. Our results agree with  
368 several clinical studies that underline a role of DHX15 in tumor progression in  
369 several types of cancer, such as acute myeloid leukemia (Pan et al., 2017),  
370 hepatocellular carcinoma (Xie et al., 2019), malignant peripheral nerve sheath  
371 tumors (Nakagawa et al., 2006), prostate cancer (Jing et al., 2018) and non-  
372 small-cell lung cancer (Yao et al., 2019). In all these situations, modifications of  
373 DHX15 activity and/or its overexpression favors tumor growth. Several  
374 mechanisms have been proposed in these studies to explain the tumorigenicity  
375 effect of DHX15, such as the co-activation of the androgen receptor in prostate  
376 cancer and the transcriptional activation of NF-κB in leukemia cells. In our  
377 study, we provided an additional and a more general mechanism of DHX15 that  
378 is relevant for tumor progression: the regulation of the growth and the function  
379 of the vasculature.



380 The use of RNAseq and proteomics, combined with bioinformatics down-stream  
381 analysis, is one of the most potent approaches to investigate the role played by  
382 RNA helicases, as changes in differential splicing of a gene may or may not be  
383 associated with changes in its protein abundance; therefore we need the  
384 combined result of both high-throughput approaches. Adopting this strategy, we  
385 were able to identify in the DHX15-silenced LEC significant changes in key  
386 pathways that metabolize carbohydrates. Some of the genes products that  
387 varied were UDP-glucose:glycoprotein glucosyltransferase 1, glyceraldehyde-3-  
388 phosphate dehydrogenase, fructose-bisphosphate aldolase A, and pyruvate  
389 kinase. This differential expression was also associated with a significant  
390 increase in the lactate levels and a reduction in the intracellular concentration of  
391 ATP. These metabolic changes suggest a regulatory compensatory effect of the  
392 glycolytic enzymes due to the uncoupling of glycolysis with the oxidation of  
393 pyruvate into the mitochondria. Supporting this possibility, we observed by  
394 RNAseq significant expression changes in members of the family of the NADH  
395 dehydrogenase [ubiquinone] 1 alpha subcomplex assembly factor (members  
396 from NDUFS1, NDUFS5 and NDUFS7). These members are accessory  
397 subunits of the mitochondrial membrane respiratory chain NADH  
398 dehydrogenase (Complex I), that transfer electrons from NADH to ubiquinone in  
399 the mitochondrial respiratory chain. Among them, we observed a significant  
400 alteration in the splicing of the NDUFS1 gene. This alteration in gene splicing  
401 was linked with a 50% reduction of the activity of the complex I in the  
402 mitochondria of DHX15 silenced cells that may explain the decrease of ATP  
403 intracellular levels and, as a consequence, the impairment in endothelial cell  
404 proliferation and vascular growth.

405 Endothelial cells are mainly considered a glycolytic cell type that maintain their  
406 energy demands by exploiting the glycolytic pathway preferentially without need  
407 of coupling to the tricarboxylic acid cycle and the oxidative phosphorylation  
408 (Martinive et al., 2006; Rath et al., 2012). However, some studies support the  
409 notion that mitochondria electron transport chain activity is also playing a role in  
410 driving endothelium angiogenesis and function. For example, low concentration  
411 of oxygen results in the generation of mitochondrial ROS through the Complex  
412 III of the electron transport chain (Bell et al., 2007). This increase in  
413 mitochondrial ROS regulates angiogenic factors such as HIF-1a, promoting its  
414 stabilization and allowing the transcription of the VEGFa gene (Jung et al.,  
415 2013; Xia et al., 2007). Also, HUVEC and HDMEC depend on mitochondrial  
416 oxidative phosphorylation to maintain energy supplies for proliferation and  
417 growth, as demonstrated by measuring oxygen consumption and ATP  
418 production in the presence of the mitochondrial uncoupler embelin (Coutelle et  
419 al., 2014). Another transport electron chain inhibitor, rotenone that blocks  
420 Complex I activity, reduced the angiogenic capacity of vasa vasorum  
421 endothelial cells (Lapel et al., 2017). Our study is in line with these observations  
422 and supports the idea that for optimal angiogenic response, endothelial cells  
423 require dynamic crosstalk between glycolysis and mitochondria activity, driven  
424 likely by regulators that promote a metabolic switch, as we have seen when we  
425 modified the levels of DHX15.

426 In conclusion, our study establishes for the first time a vascular and metabolic  
427 regulatory role for one RNA helicase member, DHX15, that has a repercussion  
428 in pathological processes such as impaired lymphatic drainage and tumor  
429 growth. Our results highlight the therapeutic potential of the modulation of

430 DHX15 expression in the context of these diseases. However, our study also  
431 raised challenging and exciting questions concerning the function specificity and  
432 the redundancy of the RNA-helicase family that need clarification before moving  
433 forward in the selection of potential therapeutic targets from this family of  
434 enzymes.

435

436

437

438

439 **MATERIALS AND METHODS**

440 ***DHX15 transgenic mice.*** *DHX15* gene deficient C57BL/6 mice were generated  
441 by genomic editing by microinjecting TALEN (transcription activator-like effector  
442 nuclease technology) RNA in pronucleated oocytes (Cyagen). The mouse  
443 *DHX15* gene (GenBank accession number: NM\_007839.3; Ensembl:  
444 ENSMUSG00000029169) is located on chromosome 5. Fourteen exons have  
445 been identified for this gene, with the ATG start codon in exon 1 and the TGA  
446 stop codon in exon 14. Exon 2 was selected as TALEN target sites. TALENs  
447 were constructed using the Golden Gate Assembly method (Cermak et al.,  
448 2011) and confirmed by sequencing. The amplicons were then purified and sent  
449 for DNA sequencing analysis. TALEN mRNAs generated by in vitro transcription  
450 were injected into fertilized eggs for knockout mouse production (cDNA  
451 sequence: TGTTGGTGAGACTGGGTC). The pups were genotyped by PCR  
452 followed by sequence analysis. The positive founders were breeding to the next  
453 generation, which was genotyped by PCR and DNA sequencing analysis. DNA  
454 sequencing revealed two different *DHX15*-deficient mouse clones: Mouse-  
455 ID#35 that was missing 8 bases in one strand, and Mouse-ID#39 that was  
456 missing 1 base in one strand. Wild-type DNA was used as a negative control for  
457 sequencing in parallel. The mRNA transcribed from targeted allele with  
458 frameshift undergoes nonsense-mediated decay (NMD).

459 All animals were kept under constant temperature and humidity in a 12 hours  
460 controlled dark/light cycle, and they were fed *ad libitum* on a standard pellet  
461 diet. We performed the study following the guidelines of the Investigation and  
462 Ethics Committees of the Hospital Clínic and the University of Barcelona.

463 **Mouse genotyping.** Mouse genomic DNA was isolated from tail biopsies using  
464 a specific kit (Extract-N-Amp™ Tissue PCR Kit; Sigma-Aldrich, Darmstadt,  
465 Germany). PCR was performed using the primer pairs to amplify the *DHX15*  
466 gene (primer forward: 5'CACCAACCTGCCCCATACTCCT-3' and primer  
467 reverse: 5'-TGTATTGTCCCAGGGTAAAATGTGTTG-3'). PCR conditions were  
468 as follows: 35 cycles at 94°C for 30 s, 59.3°C for 30 s, and 72°C for 60 s. PCR  
469 product was sequenced by sanger sequencing to distinguish the *DHX15* wild  
470 type mice and *DHX15* transgenic mice.

471 **Immunological staining of mouse embryo whole-mounts.** Embryos were  
472 harvested at different points between E8.5 to E10.5. Embryos at E10.5 were  
473 fixed in 4% paraformaldehyde overnight at 4°C. For immunostaining of whole  
474 mount embryos, after paraformaldehyde fixation, the embryos were sequentially  
475 dehydrated in methanol and then incubated in the permeabilization buffer  
476 (PBlec) (PBS pH6.8, 1% Tween 20, 1mM CaCl<sub>2</sub>, 1mM MgCl<sub>2</sub>, 0.1 mM MnCl<sub>2</sub>)  
477 for 20 minutes at room temperature. After permeabilization, the embryos were  
478 incubated with primary antibody rat anti-endomucin (Abcam, Cambridge, UK)  
479 (1:20 dilution) in PBlec buffer overnight at 4°C. To remove residual primary  
480 antibody, embryos were washed with PBT (PBS pH6.8, 0.1% Tween) for 5×10  
481 minutes. Next, the embryos were incubated with secondary antibody Alexa  
482 Fluor 488-conjugated goat anti-rat (Thermo Fisher, Waltham, MA, USA) (1:500  
483 dilution) in the dark overnight at 4°C, and then washed with PBT for 3×10  
484 minutes and postfix in 4% paraformaldehyde. Images were acquired using  
485 fluorescence stereomicroscope (Leica Microsystems, Heerbrugg, Switzerland)  
486 and immunofluorescence microscope (Nikon Eclipse E600, Kanagawa, Japan)  
487 systems.

488 **Generation of the Zebrafish animal model.** Adults wild-type zebrafish (*Danio*  
489 *rerio*), in a Tg(*flk1*:EGFP);Tg(*fabp10*:RFP) background, purchased from KIT -  
490 European Zebrafish Resource Center (EZRC), were maintained at 28–29 °C on  
491 a light cycle of 14 hours light/10 hours dark. The Crispr/cas9 design for gene  
492 knock-out was performed as follows: Gene sequences were retrieved from  
493 <http://www.ncbi.nlm.nih.gov/gene> and  
494 [http://www.ensembl.org/Danio\\_rerio/Info/Index](http://www.ensembl.org/Danio_rerio/Info/Index). The sgRNA was designed  
495 using the online tool <http://crispor.tefor.net>, based on exon site and high efficacy  
496 and off-target published algorithms. Microinjection was performed at 1-cell  
497 stage embryos. Fertilized zebrafish embryos were collected in E3 medium.  
498 Then, embryos were grown at 28.5 °C.

499 **Zebrafish whole mount in situ hybridization (ISH).** cDNAs were amplified by  
500 PCR from a custom zebrafish cDNAs library obtained by RT-PCR from an  
501 mRNA pool coming from 5 days post fertilization zebrafish larvae. We included  
502 a SP6 sequence linker in reverse primers to directly use the synthesized PCR  
503 products as templates to amplify the reverse riboprobe to be used for ISH. For  
504 the ISH, embryos were fixed overnight with 4% PFA and washed twice with  
505 PBT. Then, embryos were incubated with hybridation buffer (50% formamide,  
506 5X SSC buffer pH 6 (0.75M NaCl, 0.075M sodium citrate), 0.1% triton, 50  
507 µg/mL yeast RNA, 50 µg/mL heparin) at least 1 hour. Next, embryos were  
508 incubated with hybridation buffer containing the reverse riboprobe overnight.  
509 Finally, embryos were washed with washing solution (50% formamide, 1X SSC  
510 buffer, 0.1% Tween) 30 minutes twice and with MABT (100 mM maleic acid pH  
511 7.5, 150 mM NaCl, 0.1% Tween) 10 minutes five times. Stained embryos were

512 processed for imaging with bright field stereoscope to determine the overall  
513 expression pattern.

514 ***Zebrafish vascular characterization.*** Five-day old larvae obtained by pairwise  
515 mating of adult Tg(*flk1:EGFP;fab10:RFP; DHX15<sup>+/-</sup>*) were sorted in two groups  
516 depending on two criteria: a) curly larvae with abnormal development or b)  
517 normal developed larvae. Larvae were flat-mounted and analyzed by confocal  
518 imaging (Zeiss AxioObserver Z1) to evaluate putative phenotypical defects in  
519 the trunk angiogenesis caused by the gene knockout. Genomic DNA extracted  
520 from the whole embryos (using Extract-N-Amp™ Tissue PCR Kit, Sigma) was  
521 used for the genotyping after vasculature imaging.

522 ***Mouse femoral artery ligation model and magnetic resonance imaging***  
523 ***(MRI).*** Mice were anesthetized with a mixture of 4% isoflurane and 100%  
524 oxygen. The femoral artery was isolated, and 5-0 suture was tied tightly around  
525 artery at a ~3 mm distance to the inguinal ligament. Mice were allowed 4 weeks  
526 to recover following the surgical procedure.

527 MRI experiments were conducted on a 7T BioSpec 70/30 horizontal animal  
528 scanner (Bruker BioSpin, Ettlingen, Germany), equipped with a 12 cm inner  
529 diameter actively shielded gradient system (400 mT/m) using a surface coil  
530 dedicated to abdominal imaging. Animals were first anesthetized (1.5%  
531 isoflurane in a mixture of 30% O<sub>2</sub> and 70% CO<sub>2</sub>) and the tail vein was  
532 cannulated for administration of contrast agent. Then, animals were transferred  
533 under the same anesthesia regime to a Plexiglas holder in supine position with  
534 a nose cone for administering anesthetic gases and fixed by a tooth bar, ear  
535 bars and adhesive tape. 3D-localizer scans were used to ensure accurate  
536 position of the animal's midline at the level of the posterior limbs in the isocenter

537 of the magnet. T2-weighted images were acquired by a RARE (rapid acquisition  
538 with relaxation enhancement) sequence with an effective echo time (TE) of 24  
539 ms, repetition time (TR) 1201 ms and RARE factor 8. Matrix size was 256x256  
540 with an in-plane voxel size of 0.156x0.156 mm<sup>2</sup>, 15 slices, slice thickness 1mm,  
541 resulting in a field of view (FOV) of 40x40x15 mm<sup>3</sup>. Time of flight 3D  
542 angiography was acquired a FLASH (Fast Low Angle Shot) protocol with  
543 TE=2.4 ms, TR=14000 ms, flip angle 20°, 3 averages, matrix size:  
544 448x256x128, voxel size 0.078x0.078x0.234 mm<sup>3</sup>, resulting in a FOV of  
545 35x20x30 mm<sup>3</sup>. The shortening of the T1-relaxation time by the contrast agent  
546 enhanced the tissue signal. T1 map was acquired using RARE-VTR (rapid  
547 acquisition with relaxation enhancement and variable repetition time) sequence,  
548 with TE=7 ms, 6 TR=200, 400, 800, 1500, 3000, 5500 ms, matrix size: 96x96x3,  
549 voxel size 0.417x0.417x1 mm<sup>3</sup>, resulting in a FOV of 40x40x3 mm<sup>3</sup>.

550 To estimate the T1-relaxation rate and to measure the contrast agent relative  
551 concentration DCE (dynamic contrast enhanced)-MR imaging was used with a  
552 T1-weighted gradient-echo sequence. FLASH protocol was used with TE=1.5  
553 ms, TR=12500 ms, flip angle 15°, 600 repetitions and identical matrix, resolution  
554 and FOV than T1 map. 0.025 mM/kg of gadoteridol was administered after the  
555 first 100 repetitions were acquired as baseline. Altogether, the MRI session  
556 lasted for 50 minutes approximately. After that, mice were returned to their  
557 home cage under close supervision until they were recovered from the  
558 anesthesia.

559 T1 maps were calculated in Paravision 6.0 software (Bruker BioSpin, Ettlingen,  
560 Germany). Later these maps were processed with custom-made algorithms  
561 programmed in Matlab (The MathWorks, Inc, Natick, MA, USA). A binary mask



562 was manually drawn over the T1 map in order to segment the muscle in both  
563 legs. The first 40 volumes of the DCE acquisition were removed to assure the  
564 signal stabilization. Also, the last 50 volumes were discarded to avoid second  
565 pass effects. The slices of the temporal acquisition were spatially smoothed with  
566 a Gaussian filter (standard deviation = 0.5) and temporal smoothed with a  
567 moving average of 25 neighbors. The baseline of the signal was considered  
568 using the 20 volumes after the 10<sup>th</sup>. The signal intensities of the temporal  
569 acquisitions were converted to gadolinium concentrations using the method  
570 described in (Barboriak et al., 2008; Li et al., 2000; Ortuño et al., 2013). The T1  
571 map acquired before the DCE was used as reference values for the  
572 magnetization and the Gadoteridol relaxivity was considered to be 3.35 s<sup>-1</sup>mM<sup>-1</sup>  
573 (Shen et al., 2014). Finally, the obtained concentration curves were also  
574 smoothed with a moving average of 9 neighbors. From the concentration  
575 curves, different parameters were estimated, such as the time to peak (TTP),  
576 the bolus arrival time (BAT) (using the method described in (Cheong et al.,  
577 2003), relative time to peak (rTTP) (considering the bolus arrival time as starting  
578 point), the wash in and wash out slopes, and the area under the gadolinium  
579 concentration curve (AUC).

580 ***Mouse-induced tumor model.*** LLC1 (Mouse Lewis lung cancer cells) (ATCC,  
581 Manassas, VA, USA) were cultured in Dulbecco's Modified Eagle Medium  
582 (DMEM) supplemented with 10% fetal calf serum, 50 U/ml penicillin and 50  
583 µg/ml streptomycin in humidified atmosphere at 37°C and 5% CO<sub>2</sub>. Syngeneic  
584 LLC1 tumor cells (1x10<sup>5</sup>) were subcutaneously injected into the flank of  
585 DHX15<sup>+/-</sup> and wild-type mice. Primary tumor growth was controlled during the  
586 first 3 weeks. Primary tumors were surgically removed 21 days after seeding.

587 Tumor volume was calculated by following formula:  $V = 4/3 \times \pi \times [\text{length} \times$   
588  $\text{depth} \times \text{width}]$ . Primary tumors were fixed in 4% PFA and cryoconserved in  
589 tissue-tek O.C.T. compound (Sakura, Flemingweg, Netherlands). The Post-  
590 surgical metastasis model was performed as follows: Two weeks after primary  
591 tumor removal, LLC1 injected mice showed distant metastasis formed in the  
592 lungs. Tile scan images of haematoxylin-eosin (H&E) stained paraffin lung  
593 sections were visualized using a microscope system (Nikon Eclipse E600,  
594 Kanagawa, Japan) and the percentage of pulmonary metastatic area as percent  
595 of total lung area was measured with Image J software (ImageJ version 1.52b;  
596 National Institutes of Health, Bethesda, MD, USA).

597 ***DHX15 silencing in liver endothelial cells.*** The silencing of *DHX15* was  
598 carried out in mouse primary hepatic endothelial cells immortalized with the  
599 SV40 virus LEC; abmGood, Richmond, Canada), through shRNA by lentiviral  
600 infection (Dharmacon, Lafayette, Colorado, USA). The SMARTvector  
601 incorporated the bipartite 3G Tet-On® induction system, an inducible system  
602 with minimal basal expression and potent activation after induction with  
603 doxycycline. Cells were cultured in Microvascular Endothelial Cell Growth  
604 Complete Medium (Pelobiotech, Planegg, Germany) in humidified atmosphere at  
605 37°C and 5% CO<sub>2</sub>.

606 ***Proteome and transcriptome analysis of siL-DHX15-LECs.*** For proteomics,  
607 proteins from non-silenced and DHX15-silenced LECs (1 mg/mL) were  
608 extracted in 100 mM NH<sub>4</sub>HCO<sub>3</sub>, 8 M urea, 2.5 mM sodium pyrophosphate, 1  
609 mM sodium orthovanadate and 1 mM β-glycerol phosphate buffer. Samples  
610 were reduced with dithiothreitol (37 °C, 60 min) and alkylated in the dark with  
611 iodoacetamide (25 °C, 30 min). The resulting protein extract was first diluted to

612 2M urea with 200 mM ammonium bicarbonate for digestion with endoproteinase  
613 LysC (1:10 w:w, 37°C, o/n, Wako, cat # 129-02541), and then diluted 2-fold with  
614 200 mM ammonium bicarbonate for trypsin digestion (1:10 w:w, 37°C, 8h,  
615 Promega cat # V5113). After digestion, peptide mix was acidified with formic  
616 acid and desalted with a MicroSpin C18 column (The Nest Group, Inc) prior to  
617 LC-MS/MS analysis. Samples were analyzed using a LTQ-Orbitrap Fusion  
618 Lumos mass spectrometer (Thermo Fisher Scientific, San Jose, CA, USA)  
619 coupled to an EASY-nLC 1000 (Thermo Fisher Scientific (Proxeon), Odense,  
620 Denmark). Peptides were loaded directly onto the analytical column and were  
621 separated reversed-phase chromatography with a 90-min gradient (0-35%  
622 ACN) in a 50-cm column with an inner diameter of 75 µm, packed with 2 µm  
623 C18 particles spectrometer (Thermo Scientific, San Jose, CA, USA). Acquired  
624 spectra were analyzed with ProteomeDiscoverer software (v2.0, Swiss-Prot  
625 mouse database as in November 2016, 16831 entries). Protein abundances  
626 were estimated with the average of the area corresponding to the three most  
627 intense peptides. Protein abundance estimates were then log-transformed,  
628 normalized by the median, and a fold change, and an adjusted *p-value* was  
629 calculated with Perseus 1.5.6.0 (Supplementary Material). The raw proteomics  
630 data have been deposited to the PRIDE repository with the dataset identifier  
631 PXD018104.

632 The transcriptome analysis was carried out using RNAseq (HiSeq, Illumina).  
633 Total RNA from *Mus musculus* was quantified by Qubit® RNA BR Assay kit  
634 (Thermo Fisher Scientific) and the RNA integrity was estimated by using RNA  
635 6000 Nano Bioanalyzer 2100 Assay (Agilent). The RNASeq libraries were  
636 prepared with KAPA Stranded mRNA-Seq Illumina® Platforms Kit (Roche-Kapa

637 Biosystems) following the manufacturer's recommendations. Briefly, 500ng of  
638 total RNA was used as the input material, the poly-A fraction was enriched with  
639 oligo-dT magnetic beads and the mRNA was fragmented. The strand specificity  
640 was achieved during the second strand synthesis performed in the presence of  
641 dUTP instead of dTTP. The blunt-ended double stranded cDNA was  
642 3'adenylated and Illumina indexed adapters (Illumina) were ligated. The ligation  
643 product was enriched with 15 PCR cycles and the final library was validated on  
644 an Agilent 2100 Bioanalyzer with the DNA 7500 assay. The libraries were  
645 sequenced on HiSeq 4000 (Illumina, Inc) in paired-end mode with a read length  
646 of 2x76bp using HiSeq 4000 SBS kit in a fraction of a HiSeq 4000 PE Cluster kit  
647 sequencing flow cell lane, following the manufacturer's protocol. Image  
648 analysis, base calling and quality scoring of the run were processed using the  
649 manufacturer's software Real Time Analysis (RTA 2.7.6) and followed by  
650 generation of FASTQ sequence files by CASAVA. RNA-seq reads were  
651 mapped against the mouse reference genome (GRCm38) using STAR version  
652 2.5.2a (Dobin et al., 2013) with ENCODE parameters for long RNA. Genes  
653 were quantified with RSEM version 1.2.28 (Li and Dewey, 2011) using the  
654 gencode M12 version. Differential expression analysis was performed with  
655 DESeq2 version 1.18 (Love et al., 2014) with default parameters. Differential  
656 alternative splicing was performed with rMATS (Shen et al., 2014). Significant  
657 splicing events with FDR<5%, absolute inclusion difference >5% and >70  
658 number of reads were considered significant.

659 Signaling pathways altered by DHX15 deficiency were modeled using Ingenuity  
660 Pathway Software (Ingenuity®Systems, Inc., Redwood City, USA). The

661 resulting *p-values* obtained by the Ingenuity Pathways Knowledge Base were  
662 adjusted for multiple comparisons using Benjamini and Hochberg's method.

663 ***Separation of respiratory complexes and supercomplexes by Clear-Native***

664 ***Page (CN-PAGE) and in-gel activity of Complex I.*** Solubilization of

665 mitochondrial membranes by detergents, CN-PAGE, and staining was  
666 performed as described by Jha et al. with minor modifications (Jha et al., 2017).

667 For this, after the mitochondria isolation from wild-type and siL-DHX15-LEC,

668 150µg of mitochondrial protein were suspended in a low-salt buffer (50 mM

669 NaCl, 50 mM imidazole, pH 7.0) and solubilized with digitonin (8 g/g protein, for

670 solubilization of respiratory chain supercomplexes). Immediately after the

671 electrophoretic run (4–13% gradient polyacrylamide gels), enzymatic

672 colorimetric reaction was performed. Complex I activity was determined by

673 incubating the gel with 2 mM Tris-HCl pH=7.4, 0.1 mg/mL NADH, and 2.5

674 mg/mL nitro blue tetrazolium (NTB) at room temperature. The original colour of

675 the complex I was preserved by fixing the gels in 50% methanol and 10% acetic

676 acid. After gel scanning, the intensity of each band was quantified by Image J

677 software (ImageJ version 1.52b; National Institutes of Health, Bethesda, MD,

678 USA).

679 ***Statistical analysis.*** In the case of homoscedasticity and normally distributed

680 data (assessed by Shapiro-Wilk test), groups were compared using a two-sided

681 Student t test or analysis of variance for independent samples. For other types

682 of data, Mann-Whitney U test, or Kruskal-Wallis test was used. Tukey's test

683 (with analysis of variance) or Dunn's test (with Kruskal-Wallis) was used as a

684 post hoc test to perform pairwise comparisons. The statistical analysis of

685 contingency tables for proportions was performed using the Fisher's exact test.

686 Differences were considered to be significant at a *p-value* less than 0.05. The  
687 data are presented as the mean±standard error of the mean.

688

689

690

691

692

693

694

695

696

697

698

699

700

701

702

703

704

705

706

707

708

709

710 **ACKNOWLEDGEMENTS**

711 This study was supported by grants from the Ministerio de Economía y  
712 Competitividad (SAF2016-75358-R and PDI2019-105502RB-100 to MM-R), co-  
713 financed by FEDER. CIBERehd, CIBERonc and CIBERbbn are financed by the  
714 Instituto de Salud Carlos III. AE-C is funded by ISCIII of the MINECO (reference  
715 PT17/0009/0019) and co-financed by FEDER. JR-V was a recipient of a  
716 BIOTRACK Postdoctoral Fellowship supported by the European Community's  
717 Seventh Framework Programme and the MINECO (Contract 229673). The  
718 CRG/UPF Proteomics Unit is part of the Spanish Infrastructure for Omics  
719 Technologies (ICTS OmicsTech) and it is a member of the ProteoRed PRB3  
720 consortium which is supported by grant PT17/0019 of the PE I+D+i 2013-2016  
721 from the Instituto de Salud Carlos III (ISCIII) and ERDF. We acknowledge  
722 support from the Spanish Ministry of Science, Innovation and Universities,  
723 "Centro de Excelencia Severo Ochoa 2013-2017", SEV-2012-0208, and  
724 "Secretaria d'Universitats i Recerca del Departament d'Economia i  
725 Coneixement de la Generalitat de Catalunya" (2017SGR595). The authors  
726 would like to thank Drs. Simone Calzolari, Rafael Miñana and Javier Terriente  
727 from ZeClinics for their helpful collaboration with the zebrafish model generation  
728 and experimentation.

729

### 730 **CONFLICT OF INTEREST**

731 The authors do not have a conflict of interest.

732

733

734

735

736 **REFERENCES**

- 737 Abdelhaleem M. 2004. Over-expression of RNA helicases in cancer. *Anticancer*  
738 *Res* **24**:3951–3953.
- 739 Abdelhaleem M, Maltais L, Wain H. 2003. The human DDX and DHX gene  
740 families of putative RNA helicases. *Genomics* **81**:618–622.  
741 doi:10.1016/S0888-7543(03)00049-1
- 742 Achen MG, Stacker SA. 2008. Molecular control of lymphatic metastasis. *Ann N*  
743 *Y Acad Sci* **1131**:225–234. doi:10.1196/annals.1413.020
- 744 Albrecht B, Hausmann M, Zitzelsberger H, Stein H, Siewert JR, Hopt U, Langer  
745 R, Höfler H, Werner M, Walch A. 2004. Array-based comparative genomic  
746 hybridization for the detection of DNA sequence copy number changes in  
747 Barrett's adenocarcinoma. *J Pathol* **203**:780–788. doi:10.1002/path.1576
- 748 Arenas JE, Abelson JN. 1997. Prp43: An RNA helicase-like factor involved in  
749 spliceosome disassembly. *Proc Natl Acad Sci U S A* **94**:11798–11802.  
750 doi:10.1073/pnas.94.22.11798
- 751 Barboriak DP, MacFall JR, Viglianti BL, Dewhirst MW. 2008. Comparison of  
752 Three Physiologically-Based Pharmacokinetic Models for the Prediction of  
753 Contrast Agent Distribution Measured by Dynamic MR Imaging. *J Magn*  
754 *Reson Imaging* **27**: 1388–1398.
- 755 Bell EL, Klimova TA, Eisenbart J, Moraes CT, Murphy MP, Budinger GRS,  
756 Chandel NS. 2007. The Qo site of the mitochondrial complex III is required  
757 for the transduction of hypoxic signaling via reactive oxygen species  
758 production. *J Cell Biol* **177**:1029–1036. doi:10.1083/jcb.200609074
- 759 Bharadwaj AS, Appukuttan B, Wilmarth PA. 2013. Role of the retinal vascular  
760 endothelial cell in ocular disease. *Prog Retin Eye Res* **32**: 102-180.



- 761 Bourgeois CF, Mortreux F, Auboeuf D. 2016. The multiple functions of RNA  
762 helicases as drivers and regulators of gene expression. *Nat Rev Mol Cell*  
763 *Biol* **17**:426–438. doi:10.1038/nrm.2016.50
- 764 Cermak T, Doyle EL, Christian M, Wang L, Zhang Y, Schmidt C, Baller JA,  
765 Somia N V., Bogdanove AJ, Voytas DF. 2011. Efficient design and  
766 assembly of custom TALEN and other TAL effector-based constructs for  
767 DNA targeting. *Nucleic Acids Res* **39**:1–11. doi:10.1093/nar/gkr218
- 768 Chen J, Somanath PR, Razorenova O, Chen WS, Bornstein P, Byzova T V.  
769 2008. Nihms-9148.Pdf **11**:1188–1196.
- 770 Chen JYF, Stands L, Staley JP, Jackups RR, Latus LJ, Chang TH. 2001.  
771 Specific alterations of U1-C protein or U1 Small nuclear RNA can eliminate  
772 the requirement of Prp28p, an essential DEAD Box splicing factor. *Mol Cell*  
773 **7**:227–232. doi:10.1016/S1097-2765(01)00170-8
- 774 Cheong LH, Koh TS, Hou Z. 2003. An automatic approach for estimating bolus  
775 arrival time in dynamic contrast MRI using piecewise continuous regression  
776 models. *Phys Med Biol* **48**. doi:10.1088/0031-9155/48/5/403
- 777 Combs DJ, Nagel RJ, Ares M, Stevens SW. 2006. Prp43p Is a DEAH-Box  
778 Spliceosome Disassembly Factor Essential for Ribosome Biogenesis. *Mol*  
779 *Cell Biol* **26**:523–534. doi:10.1128/mcb.26.2.523-534.2006
- 780 Coutelle O, Hornig-Do HT, Witt A, Andree M, Schiffmann LM, Piekarek M,  
781 Brinkmann K, Seeger JM, Liwschitz M, Miwa S, Hallek M, Krönke M,  
782 Trifunovic A, Eming SA, Wiesner RJ, Hacker UT, Kashkar H. 2014.  
783 Embelin inhibits endothelial mitochondrial respiration and impairs  
784 neoangiogenesis during tumor growth and wound healing. *EMBO Mol Med*  
785 **6**:624–639. doi:10.1002/emmm.201303016

- 786 Dobin A, Davis CA, Schlesinger F, Drenkow J, Zaleski C, Jha S, Batut P,  
787 Chaisson M, Gingeras TR. 2013. STAR: Ultrafast universal RNA-seq  
788 aligner. *Bioinformatics* **29**:15–21. doi:10.1093/bioinformatics/bts635
- 789 Fouraux MA, Kolkman MJM, Van Der Heijden A, De Jong AS, Van Venrooij WJ,  
790 Pruijn GJM. 2002. The human La (SS-B) autoantigen interacts with  
791 DDX15/hPrp43, a putative DEAH-box RNA helicase. *Rna* **8**:1428–1443.  
792 doi:10.1017/S1355838202021076
- 793 Fuller-Pace F V. 2013. DEAD box RNA helicase functions in cancer. *RNA Biol*  
794 **10**:121–132. doi:10.4161/rna.23312
- 795 Fuller-Pace F V. 2006. DExD/H box RNA helicases: Multifunctional proteins  
796 with important roles in transcriptional regulation. *Nucleic Acids Res*  
797 **34**:4206–4215. doi:10.1093/nar/gkl460
- 798 Heerma van Voss MR, van Diest PJ, Raman V. 2017. Targeting RNA helicases  
799 in cancer: the translation trap. *Biochim Biophys Acta* **1898**: 510-520.
- 800 Imamura O, Sugawara M, Furuichi Y. 1997. Cloning and characterization of a  
801 putative human RNA helicase gene of the DEAH-box protein family.  
802 *Biochem Biophys Res Commun* **240**:335–340. doi:10.1006/bbrc.1997.7585
- 803 Jankowsky A, Guenther UP, Jankowsky E. 2011. The RNA helicase database.  
804 *Nucleic Acids Res* **39**:338–341. doi:10.1093/nar/gkq1002
- 805 Jankowsky E, Gross CH, Shuman S, Pyle AM. 2001. Active disruption of an  
806 RNA-protein interaction by a DExH/D RNA helicase. *Science (80- )*  
807 **291**:121–125. doi:10.1126/science.291.5501.121
- 808 Jha P, Wang X, Auwerx J. 2017. Analysis of mitochondrial respiratory chain  
809 supercomplexes using blue native polyacrylamide gel electrophoresis (BN-  
810 PAGE). *Curr Protoc Mouse Biol* **6**: 1–14.

- 811 Jiang ZH, Wu JY. 1999. Alternative splicing and programmed cell death. *Proc*  
812 *Soc Exp Biol Med* **220**:64–72. doi:10.3181/00379727-220-44346
- 813 Jing Y, Nguyen MM, Wang D, Pascal LE, Guo W, Xu Y, Ai J, Deng F, Masoodi  
814 KZ, Yu X, Zhang J, Nelson JB, Xia S, Wang Z. 2018. Siah2-mediated  
815 ubiquitination of androgen receptor **37**:638–650.  
816 doi:10.1038/onc.2017.371.DHX15
- 817 Jung HJ, Kim Y, Chang J, Kang SW, Kim JH, Kwon HJ. 2013. Mitochondrial  
818 UQCRB regulates VEGFR2 signaling in endothelial cells. *J Mol Med*  
819 **91**:1117–1128. doi:10.1007/s00109-013-1049-6
- 820 Jung HM, Castranova D, Swift MR, Pham VN, Venero Galanternik M, Isogai S,  
821 Butler MG, Mulligan TS, Weinstein BM. 2017. Development of the larval  
822 lymphatic system in zebrafish. *Development* **144**:2070–2081.  
823 doi:10.1242/dev.145755
- 824 Lapel M, Weston P, Strassheim D, Karoor V, Burns N, Lyubchenko T, Paucek  
825 P, Stenmark KR, Gerasimovskaya E V. 2017. Glycolysis and oxidative  
826 phosphorylation are essential for purinergic receptor-mediated angiogenic  
827 responses in vasa vasorum endothelial cells. *Am J Physiol - Cell Physiol*  
828 **312**:C56–C70. doi:10.1152/ajpcell.00250.2016
- 829 Lee MY, Luciano AK, Ackah E, Rodriguez-Vitad J, Bancroft TA, Eichmann A,  
830 Simons M, Kyriakides TR, Morales-Ruiz M, Sessa WC. 2014. Endothelial  
831 Akt1 mediates angiogenesis by phosphorylating multiple angiogenic  
832 substrates. *Proc Natl Acad Sci U S A* **111**:12865–12870.  
833 doi:10.1073/pnas.1408472111
- 834 Li B, Dewey CN. 2011. RSEM: accurate transcript quantification from RNA-Seq  
835 data with or without a reference genome. *BMC Bioinformatics* **12**: 323.

- 836 Li KL, Zhu XP, Waterton J, Jackson A. 2000. Improved 3D quantitative mapping  
837 of blood volume and endothelial permeability in brain tumors. *J Magn*  
838 *Reson Imaging* **12**:347–357. doi:10.1002/1522-  
839 2586(200008)12:2<347::AID-JMRI19>3.0.CO;2-7
- 840 Lin ML, Fukukawa C, Park JH, Naito K, Kijima K, Shimo A, Ajiro M, Nishidate T,  
841 Nakamura Y, Katagiri T. 2009. Involvement of G-patch domain containing 2  
842 overexpression in breast carcinogenesis. *Cancer Sci* **100**:1443–1450.  
843 doi:10.1111/j.1349-7006.2009.01185.x
- 844 Love MI, Huber W, Anders S. 2014. Moderated estimation of fold change and  
845 dispersion for RNA-seq data with DESeq2. *Genome Biol* **15**:1–21.  
846 doi:10.1186/s13059-014-0550-8
- 847 Martin A, Schneider S, Schwer B. 2002. Prp43 is an essential RNA-dependent  
848 ATPase required for release of lariat-intron from the spliceosome. *J Biol*  
849 *Chem* **277**:17743–17750. doi:10.1074/jbc.M200762200
- 850 Martinive P, Defresne F, Bouzin C, Saliez J, Lair F, Grégoire V, Michiels C,  
851 Dessy C, Feron O. 2006. Preconditioning of the tumor vasculature and  
852 tumor cells by intermittent hypoxia: Implications for anticancer therapies.  
853 *Cancer Res* **66**:11736–11744. doi:10.1158/0008-5472.CAN-06-2056
- 854 Mosallanejad K, Sekine Y, Ishikura-Kinoshita S, Kumagai K, Nagano T,  
855 Matsuzawa A, Takeda K, Naguro I, Ichijo H. 2014. The DEAH-Box RNA  
856 helicase DHX15 activates NF- $\kappa$ B and MAPK signaling downstream of  
857 MAVS during antiviral responses. *Sci Signal* **7**:1–12.  
858 doi:10.1126/scisignal.2004841
- 859 Mumprecht V, Detmar M. 2009. Lymphangiogenesis and cancer metastasis. *J*  
860 *Cell Mol Med* **13**:1405–1416. doi:10.1111/j.1582-4934.2009.00834.x

- 861 Nakagawa Y, Yoshida A, Numoto K, Kunisada T, Wai D, Ohata N, Takeda K,  
862 Kawai A, Ozaki T. 2006. Chromosomal imbalances in malignant peripheral  
863 nerve sheath tumor detected by metaphase and microarray comparative  
864 genomic hybridization. *Oncol Rep* **15**:297–303. doi:10.3892/or.15.2.297
- 865 Nishida N, Yano H, Nishida T, Kamura T, Kojiro M. 2006. Angiogenesis in  
866 cancer. *Vasc Health Risk Manag* **2**:213–219.  
867 doi:10.2147/vhrm.2006.2.3.213
- 868 Niu Z, Jin W, Zhang L, Li X. 2012. Tumor suppressor RBM5 directly interacts  
869 with the DExD/H-box protein DHX15 and stimulates its helicase activity.  
870 *FEBS Lett* **586**:977–983. doi:10.1016/j.febslet.2012.02.052
- 871 Ortuño JE, Ledesma-C, Arbayo MJ, Simões R V, Candiota AP, Arús C. 2013.  
872 DCE@urLAB: a dynamic contrast-enhanced MRI pharmacokinetic analysis  
873 tool for preclinical data. *BMC Bioinformatics* **14**.
- 874 Pan L, Li Y, Zhang HY, Zheng Y, Liu XL, Hu Z, Wang Y, Wang Jing, Cai YH, Liu  
875 Q, Chen WL, Guo Y, Huang YM, Qian F, Jin L, Wang Jiucun, Wang SY.  
876 2017. DHX15 is associated with poor prognosis in acute myeloid leukemia  
877 (AML) and regulates cell apoptosis via the NF-κB signaling pathway.  
878 *Oncotarget* **8**:89643–89654. doi:10.18632/oncotarget.20288
- 879 Patel SS, Donmez I. 2006. Mechanisms of helicases. *J Biol Chem* **281**:18265–  
880 18268. doi:10.1074/jbc.R600008200
- 881 Pauta M, Rotllan N, Fernández-Hernando A, Langhi C, Ribera J, Lu M, Boix L,  
882 Bruix J, Jimenez W, Suárez Y, Ford DA, Baldán A, Birnbaum MJ, Morales-  
883 Ruiz M, Fernández-Hernando C. 2016. Akt-mediated foxo1 inhibition is  
884 required for liver regeneration. *Hepatology* **63**:1660–1674.  
885 doi:10.1002/hep.28286

- 886 Rath G, Saliez J, Behets G, Romero-Perez M, Leon-Gomez E, Bouzin C, Vriens  
887 J, Nilius B, Feron O, Dessy C. 2012. Vascular hypoxic preconditioning  
888 relies on TRPV4-dependent calcium influx and proper intercellular gap  
889 junctions communication. *Arterioscler Thromb Vasc Biol* **32**:2241–2249.  
890 doi:10.1161/ATVBAHA.112.252783
- 891 Robert F, Pelletier J. 2013. Perturbations of RNA helicases in cancer. *Wiley*  
892 *Interdiscip Rev RNA* **4**:333–349. doi:10.1002/wrna.1163
- 893 Shen S, Park JW, Lu ZX, Lin L, Henry MD, Wu YN, Zhou Q, Xing Y. 2014.  
894 rMATS: Robust and flexible detection of differential alternative splicing from  
895 replicate RNA-Seq data. *Proc Natl Acad Sci U S A* **111**:E5593–E5601.  
896 doi:10.1073/pnas.1419161111
- 897 Sleeman JP, Thiele W. 2009. Tumor metastasis and the lymphatic vasculature.  
898 *Int J Cancer* **125**:2747–2756. doi:10.1002/ijc.24702
- 899 Steimer L, Klostermeier D. 2012. RNA helicases in infection and disease. *RNA*  
900 *Biol* **9**:751–771. doi:10.4161/rna.20090
- 901 Studer MK, Ivanović L, Weber ME, Marti S, Jonas S. 2020. Structural basis for  
902 DEAH-helicase activation by G-patch proteins. *Proc Natl Acad Sci*  
903 201913880. doi:10.1073/pnas.1913880117
- 904 Suthar MK, Purva M, Maherchandani S, Kashyap SK. 2016. Identification and in  
905 silico analysis of cattle DEXH/D box RNA helicases. *Springerplus* **5**:1–13.  
906 doi:10.1186/s40064-015-1640-0
- 907 Tsai RT, Fu RH, Yeh FL, Tseng CK, Lin YC, Huang YH, Cheng SC. 2005.  
908 Spliceosome disassembly catalyzed by Prp43 and its associated  
909 components Ntr1 and Ntr2. *Genes Dev* **19**:2991–3003.  
910 doi:10.1101/gad.1377405

- 911 Umate P, Tuteja N, Tuteja R. 2011. Genome-wide comprehensive analysis of  
912 human helicases. *Commun Integr Biol* **4**:118–137. doi:10.4161/cib.13844
- 913 Wang P, Zhu S, Yang L, Cui S, Pan W, Jackson R, Zheng Y, Rongvaux A, Sun  
914 Q, Yang G, Gao S, Lin R, You F, Flavell R, Fikrig E, Haven N, Haven N,  
915 Haven N, Chase C. 2016. HHS Public Access **350**:826–830.  
916 doi:10.1126/science.aab3145.Nlrp6
- 917 Xia C, Meng Q, Liu LZ, Rojanasakul Y, Wang XR, Jiang BH. 2007. Reactive  
918 oxygen species regulate angiogenesis and tumor growth through vascular  
919 endothelial growth factor. *Cancer Res* **67**:10823–10830. doi:10.1158/0008-  
920 5472.CAN-07-0783
- 921 Xie C, Liao H, Zhang C, Zhang S. 2019. Overexpression and clinical relevance  
922 of the RNA helicase DHX15 in hepatocellular carcinoma. *Hum Pathol*  
923 **84**:213–220. doi:10.1016/j.humpath.2018.10.006
- 924 Yao G, Chen K, Qin Y, Niu Y, Zhang X, Xu S, Zhang C, Feng M, Wang K. 2019.  
925 Long Non-coding RNA JHDM1D-AS1 Interacts with DHX15 Protein to  
926 Enhance Non-Small-Cell Lung Cancer Growth and Metastasis. *Mol Ther -*  
927 *Nucleic Acids* **18**:831–840. doi:10.1016/j.omtn.2019.09.028
- 928
- 929
- 930
- 931
- 932
- 933
- 934
- 935



936 **FIGURES AND LEGENDS**

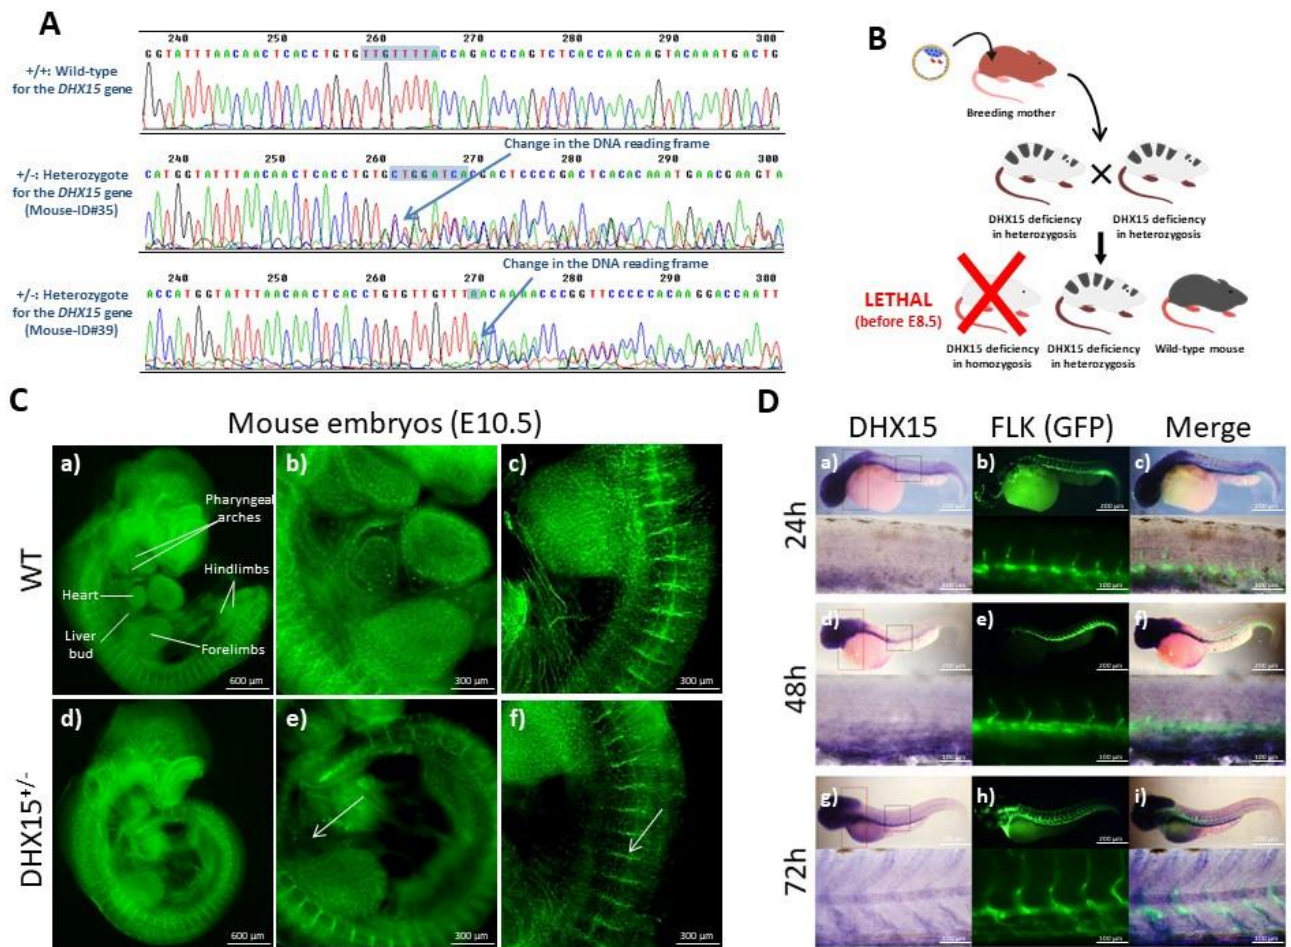

937

938 **Figure 1. Embryonic characterization of *DHX15* gene deficiency and**  
939 **expression in the gene-edited mouse and zebrafish models. (A)**  
940 **Comparison of sequencing chromatograms from wild-type and the heterozygote**  
941 **mouse of the *DHX15* gene obtained from the clones Mouse-ID#35 and Mouse-**  
942 **ID#39. The transcription activator-like effector nuclease technology (TALEN)**  
943 **target site is highlighted within the box. The arrow shows the first base from**  
944 **which the DNA reading frame undergoes nonsense-mediated decay. (B)**  
945 **Scheme showing the transgenic mouse production, from TALEN RNA injection**  
946 **in pronucleated oocytes. (C) Representative immunostaining of the vasculature**  
947 **in pronucleated oocytes. (C) Representative immunostaining of the vasculature**  
**with endomucin (green) from mouse embryos at the stage E10.5 of embryonic**



948 development. The white arrows denote areas of decreased vascular density  
949 (n=6). Maximal projection and 3D rendering from the microscope are showed  
950 for each genotype. Original magnification: 20X and 40X. (D) Representative  
951 results obtained from in situ hybridization using a labelled complementary RNA  
952 strand to localize the specific DHX15 sequence on whole-mount zebrafish  
953 embryos. DHX15 (blue) and vasculature (FLK1:EGFP; green) in zebrafish  
954 embryos at 24, 48 and 72h of post-natal development. Merged panels show  
955 DHX15 and vasculature (green) colocalization (n=15).

956

957

958

959

960

961

962

963

964

965

966

967

968

969

970

971

972

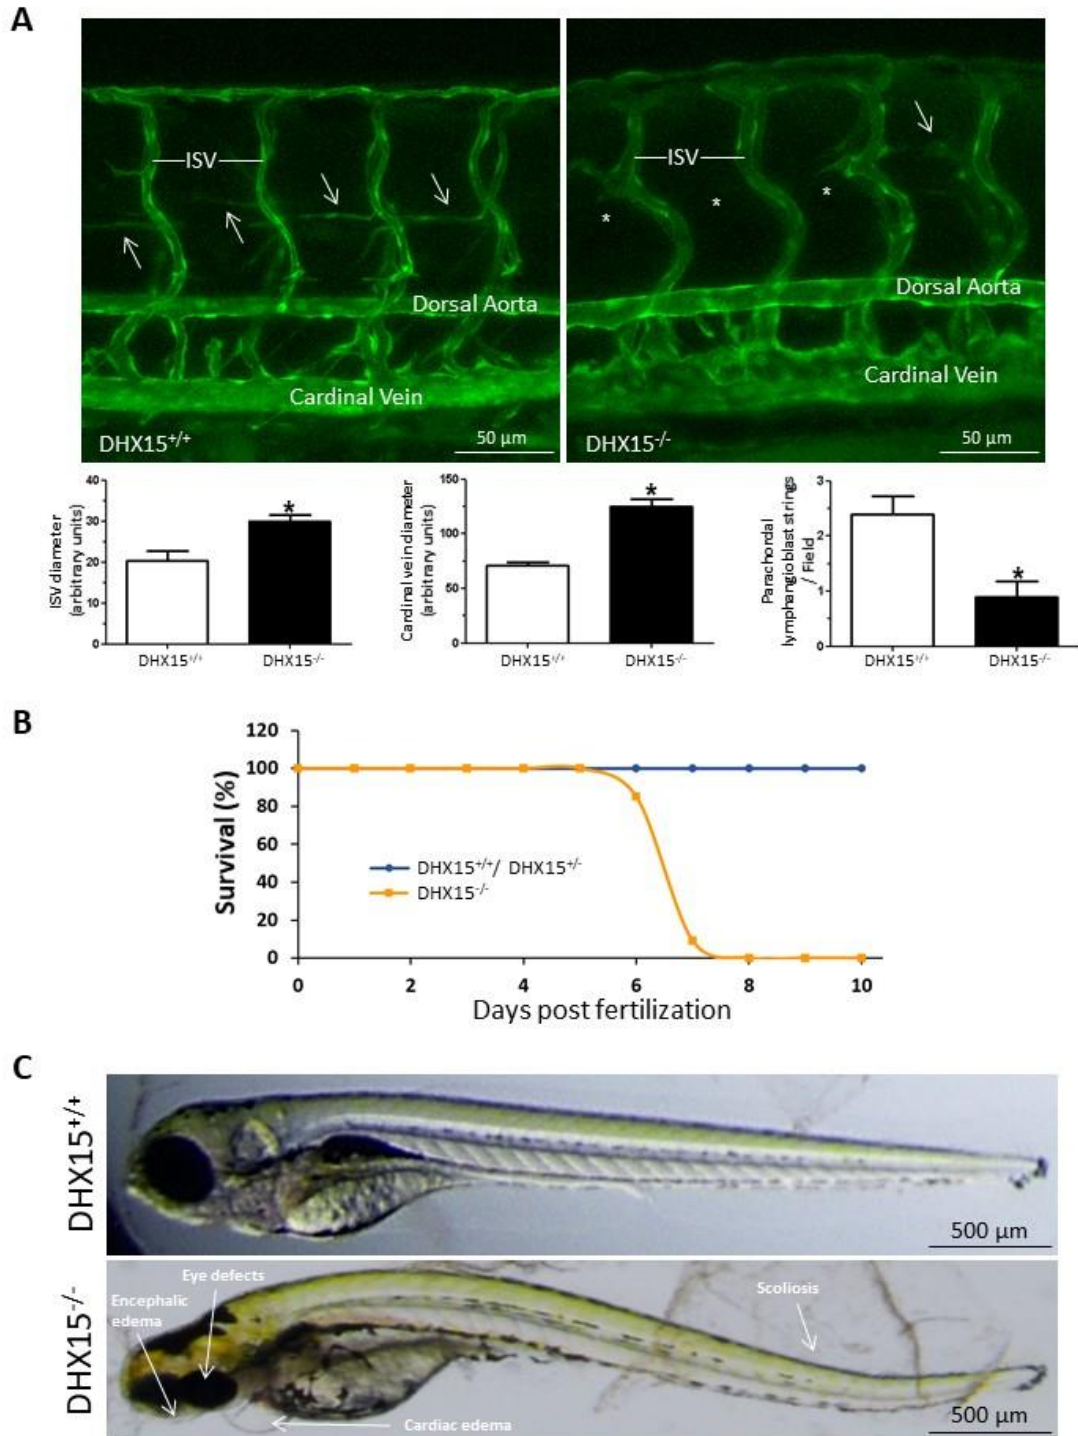

973

974 **Figure 2. Characterization of embryonic vascular anomalies motivated by**  
975 **DHX15 gene deficient in zebrafish.** (A) Representative vascular images of  
976 DHX15<sup>+/+</sup> and DHX15<sup>-/-</sup> larvae at 5 day post fertilization (dpf) revealing a  
977 reduced formation of the paracardial line (arrows). Asterisks denote the

978 absence of these vascular structures in DHX15<sup>-/-</sup> animals. Quantifications of  
979 cardinal vein diameter, intersegmental vessels (ISV), and number of  
980 parachordal structures are shown in the graphs; \* $p < 0.01$  vs. wild-type zebrafish.

981 (B) Survival assessment assay. The graph shows the larvae survival rate  
982 through the first 10 dpf according to their different genotype (n=15). (C)  
983 Representative images comparing wild-type and DHX15<sup>-/-</sup> larvae at 7 dpf where  
984 morphological defects including encephalic and cardiac edema, scoliosis, and  
985 impaired neural/eye growth are evident.

986

987

988

989

990

991

992

993

994

995

996

997

998

999

1000

1001

1002

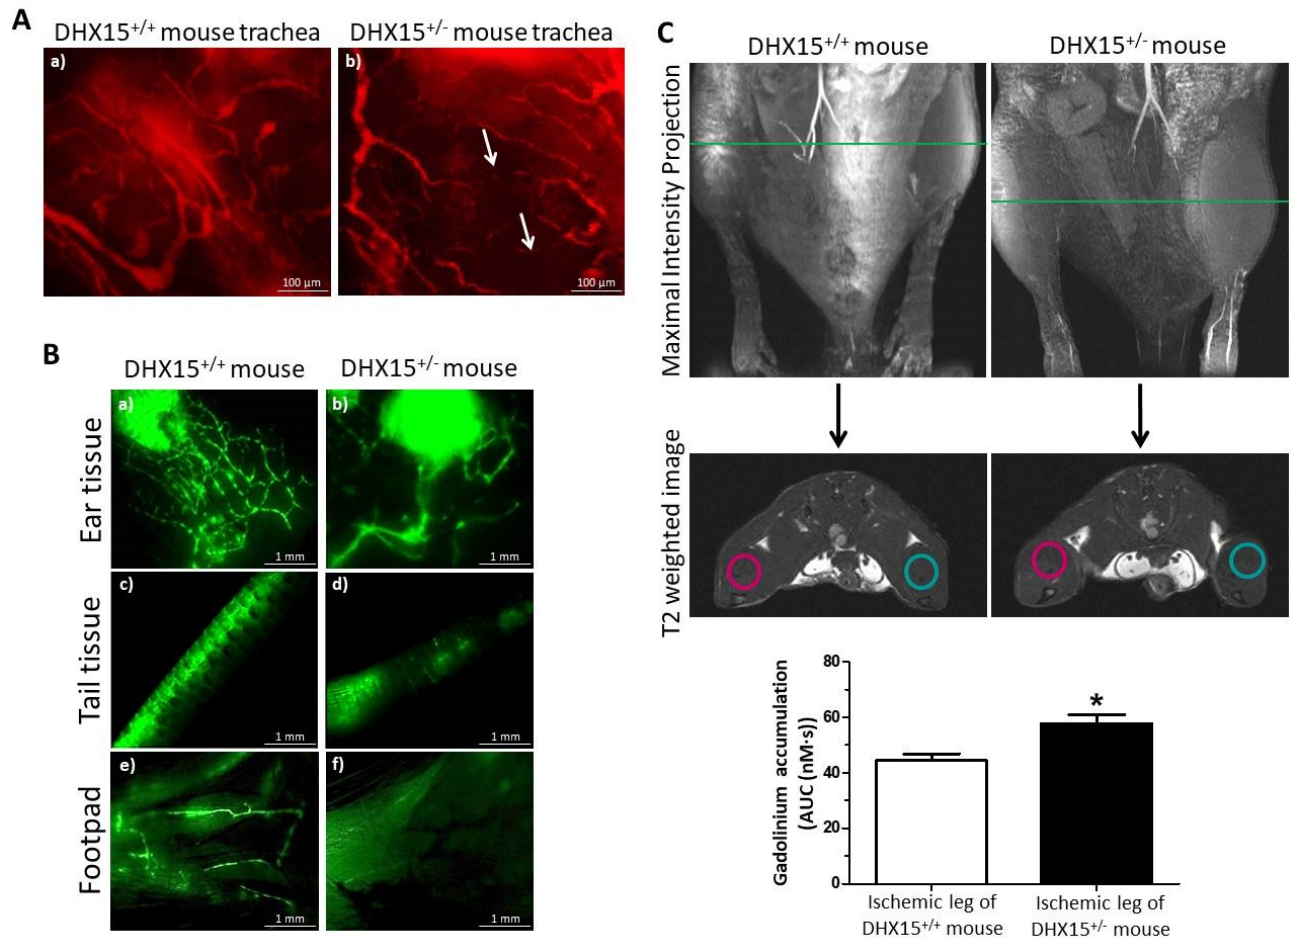

1003

1004 **Figure 3. DHX15<sup>+/-</sup> mice showed cardiovascular and lymphatic vasculature**

1005 **alterations.** (A) Representative immunofluorescent images (red CD31 staining)

1006 of mouse trachea vessels. White arrowhead evidences lack of connectivity

1007 between large vessels (n=5). (B) Lymphatic drainage of 2000 kDa FITC-

1008 dextran analyzed by lymphangiography. Fluorescent dye was injected

1009 intradermally in the ear (panels a and b), in the interstitium of the tail-tip (panels

1010 c and d) and in the footpad (panels e and f) to assess lymphatic uptake (n=5).

1011 (C) Representative magnetic resonance images (MRI) for both strains of mice.

1012 First row shows the maximal intensity projection of the time of flight (TOF)

1013 angiography. The green line indicates the position of the coronal image (second

1014 row: T2 weighted image) where the regions of interest (ROIs) for the analysis of

1015 the dynamic contrast enhanced-MRI experiment where positioned. In blue,  
1016 ROIs for the control leg, in red, ROIs for the ischemic leg. The lower graph  
1017 shows the area under the concentration curve (AUC) calculated for the ischemic  
1018 leg in WT and DHX15<sup>+/-</sup> mice; \* $p < 0.05$  vs. wild-type mouse (n=8).

1019

1020

1021

1022

1023

1024

1025

1026

1027

1028

1029

1030

1031

1032

1033

1034

1035

1036

1037

1038

1039

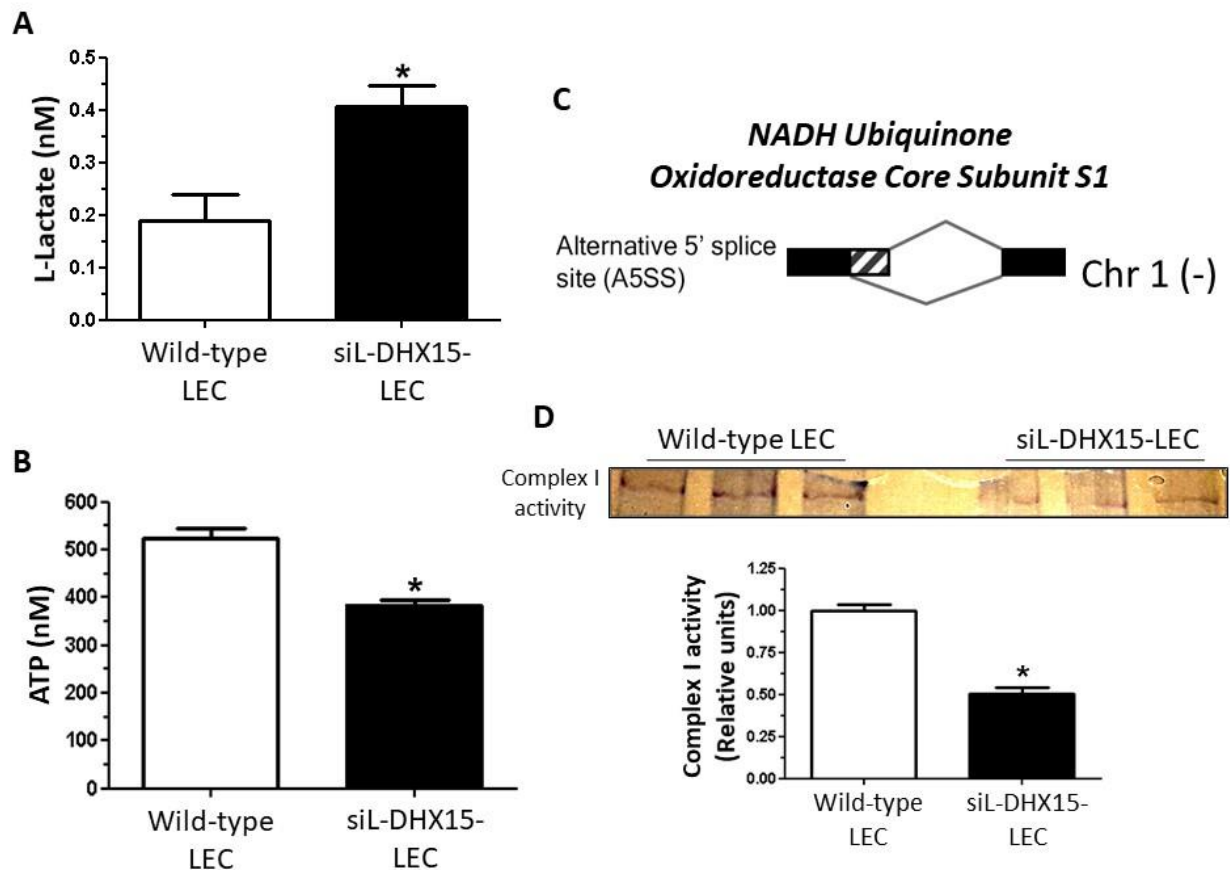

1040

1041 **Figure 4. Uncoupling of aerobic glucose metabolism in siL-DHX15-LEC.**

1042 (A) Glycolysis levels were evaluated by a colorimetric enzymatic reaction in  
1043 wild-type and silenced DHX15 liver endothelial cells (siL-DHX15-LEC) as nM of  
1044 L-Lactate; \* $p < 0.01$  vs. wild-type LEC (n=6). (B) ATP production was evaluated  
1045 by a luminescence assay in wild-type and siL-DHX15-LEC; \* $p < 0.05$  vs. wild-  
1046 type LEC (n=6). (C) Alternative splicing was quantified as described in Material  
1047 and Methods. The diagram shows the significant splicing event occurring on the  
1048 gene *NDUFS1* with an inclusion level of 6% and a FDR=0.02. The striped bar  
1049 represents the lengthening of the alternative 5' limit size of exon 1 caused by  
1050 the DHX15 silencing. (D), *In-gel* activity staining on clear-native page (CN-  
1051 PAGE) of the respiratory complex I from wild-type and siL-DHX15-LEC's

1052 mitochondria. The quantification of the relative band intensities of complex I  
1053 activity is shown in the graph below; \* $p < 0.01$  vs. wild-type LEC (n=6).

1054

1055

1056

1057

1058

1059

1060

1061

1062

1063

1064

1065

1066

1067

1068

1069

1070

1071

1072

1073

1074

1075

1076



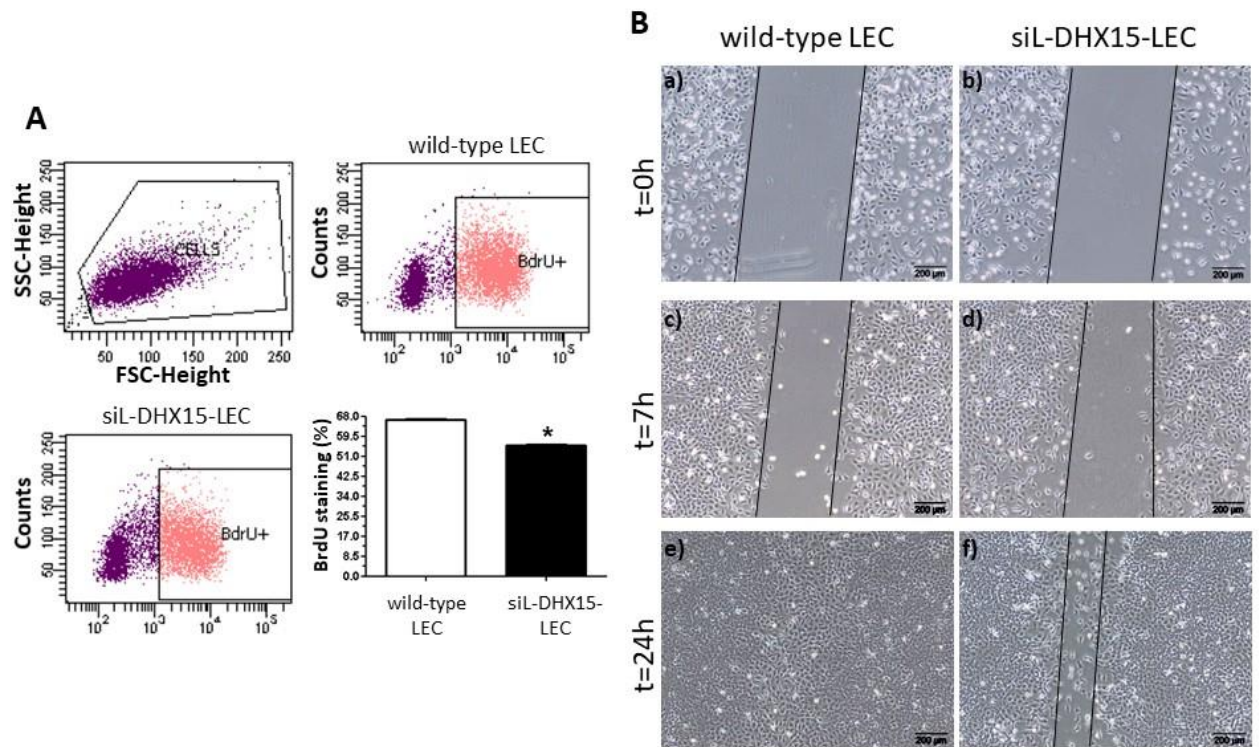

1077

1078 **Figure 5. siL-DHX15-LEC presented less cell migration and proliferation.**

1079 (A) Representative figures of the proliferation assay performed in wild-type and  
1080 silenced DHX15 liver endothelial cells (siL-DHX15-LEC). Bromodeoxyuridine  
1081 (BrdU) incorporation was quantified by flow cytometry. First panel shows a dot-  
1082 blot graph of the cell population. Cells within the oval scatter gate were  
1083 analyzed. The negative control population was chosen from cells cultured in the  
1084 absence of BrdU. The percentage of cells that stained positively for BrdU for  
1085 each experimental condition is depicted in the bar graph; \* $p < 0.01$  vs. wild-type  
1086 LEC (n=6). (B) Cell migration was quantified after performing a scratch wound in  
1087 confluent non-silenced and silenced LECs cells that were cultured in 6-well



1088 plates. Then images of wound healing were acquired after 0, 7 and 24 hours

1089 (n=6).

1090

1091

1092

1093

1094

1095

1096

1097

1098

1099

1100

1101

1102

1103

1104

1105

1106

1107

1108

1109

1110

1111

1112

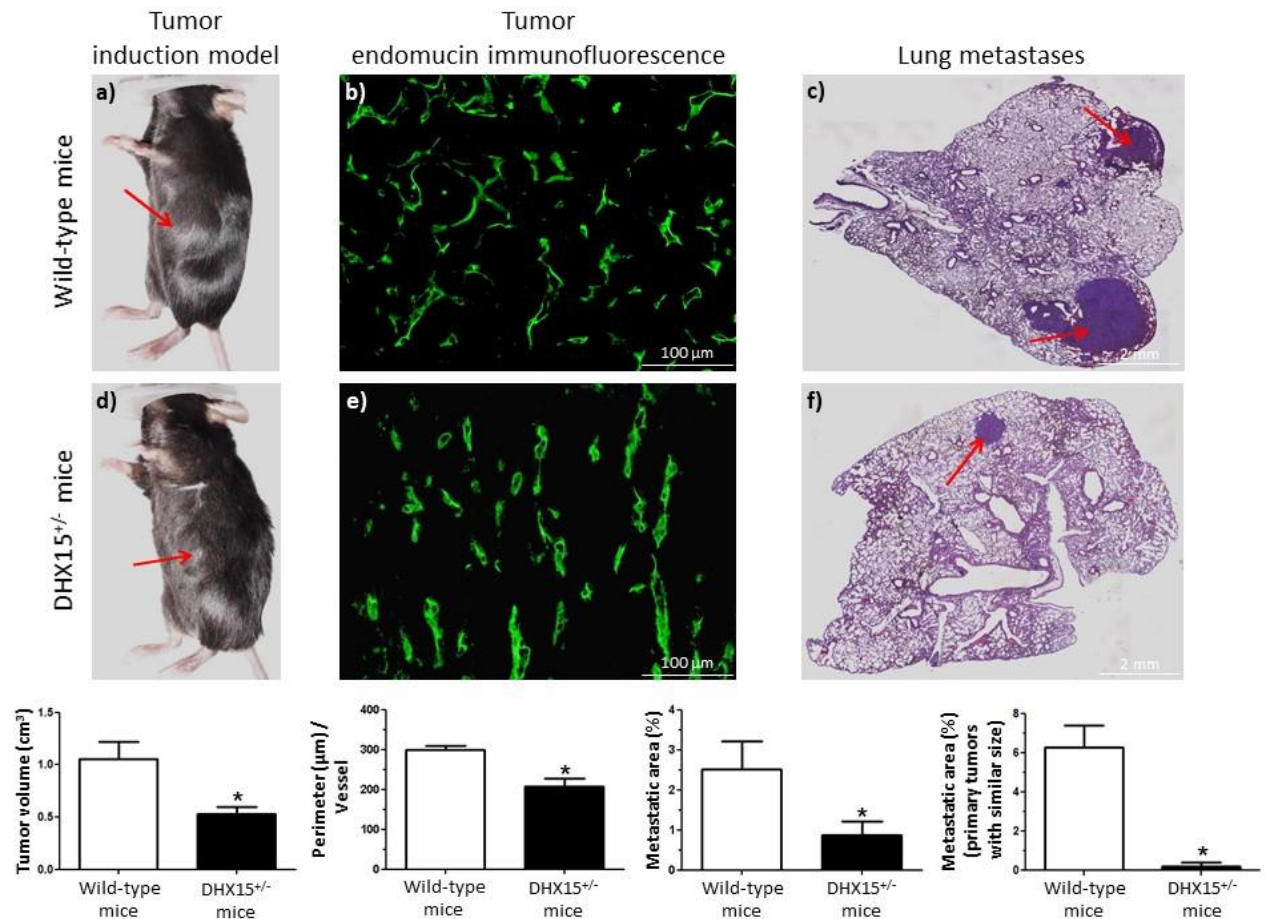

1113

1114 **Figure 6. Tumor growth and metastases in DHX15<sup>+/-</sup> mouse.** (A)

1115 Macroscopic images of tumor size in wild-type and DHX15<sup>+/-</sup> mice 3 weeks after

1116 mouse Lewis lung cancer cells (LLC1) implantation. The arrows indicate the

1117 primary tumor. The quantification of tumor volume (cm<sup>3</sup>) is shown on the lower

1118 graph; \**p*<0.01 vs. wild-type mice (n=15). (B) Endomucin immunostaining of

1119 intratumoral blood vessels in wild-type and DHX15<sup>+/-</sup> mice. Quantification of

1120 vessel perimeter is shown in the graph below; \**p*<0.01 vs. wild-type mice

1121 (n=15). Original magnification: 200X. (C) Representative lung sections and

1122 quantification of lung metastatic area after haematoxylin-eosin staining (H&E)

1123 (Fiji software analysis) are shown. The arrows indicate the metastatic areas.

1124 Quantifications of the percentage of lung metastases are shown in the graphs

1125 below; all tumors  $*p < 0.05$  vs. wild-type mice (n=15) and primary tumors with  
1126 similar size,  $*p < 0.01$  vs. wild-type mice (n=3). Original magnification: 10X.
